# Supplementary material for: A Systematic Review of the International Evolution of Online Mental Health Strategies and Recommendations During the COVID-19 Pandemic
Source: Research Square preprint supplement (doi:10.21203/rs.3.rs-1435926/v1), 2022-03-28
Supplement: Supplementary file 1 [file 0534d869733f03c5629174bc.docx]

**Supplementary material**

Items included in the questionnaires:

IG1. Symptoms

- Loneliness
- Sleeping problems
- Anxiety
- Stress
- Bereavement
- Depression

IG2. Mental disorders

- Schizophrenia and psychotic disorders
- Anxiety disorder
- Bipolar disorders
- Depression
- Substance use disorder
- Chronic pain
- Eating Disorders
- Dermatillomania
- Obsessive compulsive disorder

IG3. COVID-19 general information

- Q1: Does the strategy include information related to the latest information on Covid-19?
- Q2: Does it include information on the strategies developed by the Government in response to the pandemic…)?
- Q3: Does it includes information on the latest information about the global response to the COVID-19 outbreak?

IG4. MH strategies and MH topics

- Q4: Include psychological tips for maintaining good mental health and coping with Covid-19?
- Q6: Describe some psychological skills to help people cope with anxiety and worry about COVID-19?
- Q8: Does it promote the social connection at home?
- Q26: Does the strategy include information on how to support a loved one who is very anxious about the COVID-19?
- Q27: Does the strategy include information on how to manage the stress while people await the test results?
- Q28: Does the strategy include information on how to manage the stress in case they have tested positive?
- Q29: Does the strategy include information on the stigma and how to reduce it?
- Q32: Does the strategy include information on how to manage stress and anxiety?
- Q39: Is there any link for elderly people related to any symptoms or mental disorders?

IG5. MH strategies and MH-related topics

- Q5: How to maintain a healthy lifestyle?
- Q25: Does it include special mention to disabled people?
- Q30: Does the strategy include information for healthcare workers?
- Q31: Does the strategy include information on how to support health care workers?
- Q33: Does the strategy develop any strategy for identifying healthcare staff needs as a result of the Coronavirus pandemic?
- Q34: Does the strategy include information for domestic violence victims?
- Q35: Does the strategy include information for caregivers?
- Q36: Does the strategy include any information on financial support for bussines/people affected by COVID-19?
- Q37: Does the strategy develop any advice on medication access during the Covid-19?
- Q38: Does the strategy contemplate work at home?

IG6: MH recommendations and MH topics

- Q7: Does it provide emotional support, such as conversations for sharing tips online?
- Q9: Describe how to access mental health services?
- Q10: Provide any phone or online mental health services?
- Q11: Does it offer an online psychological assessment?
- Q12: Does it provide feedback on the psychological assessment results?
- Q13: Does it provide any mental health treatment/intervention alternative?
- Q14: Does it provide any telephone or online contact with the general practitioner?
- Q15: Does it provide any telephone or online contact with the psychologist?
- Q16: Does it provide any telephone or online contact with other mental health professional?
- Q17: Does it provide an online community forum?
- Q18: Does it provide suicide and crisis support?
- Q21: Does it provide steps for understanding child's feelings?

IG7: MH recommendations and MH-related topics

- Q19: Does it include information for parents?
- Q20: Information on how to explain the coronavirus to children?
- Q22: Does it provide any alternative to elder people to stay connected online?
- Q23: Does it help in getting established online and learning digital literacy skills?
- Q24: Does it include any guideline for COVID-19 Outbreaks in residential care facilities (for people with physical and mental disabilities, other community based health facilities (e.g. Drug and alcohol services, community mental health)?

**Documents characteristics**

Table S1. Documents included in the review

| Code | Authors (year) | Country1 | Target Population2 | Document Type3 |
| --- | --- | --- | --- | --- |
| **1** | Australian Government (1) | 1 | 1 | 2 |
| **2** | Centre for Addiction and Mental Health (2) | 2 | 1 | 2 |
| **3** | Ireland's Health Services (3) | 8 | 1 | 2 |
| **4** | Mental Health Ireland (4) | 8 | 1 | 2 |
| **5** | Gobierno de México (5) | 10 | 1 | 2 |
| **6** | Mental Health America (6) | 16 | 1 | 2 |
| **7** | Centers for Disease Control and Prevention (7) | 16 | 1 | 2 |
| **8** | MindHK (8) | 3 | 1 | 1 |
| **9** | Centre for Health Protection (9) | 3 | 1 | 2 |
| **10** | New Zealand Government (10) | 11 | 1 | 2 |
| **11** | Spanish Society of Psychiatry (11) | 14 | 1 | 1 |
| **12** | Psychology General Council of Spain (12) | 14 | 1 | 2 |
| **13** | Gov.UK (United Kingdom Government) (13) | 4 | 1 | 2 |
| **14** | Mental Health Foundation (14) | 4 | 1 | 2 |
| **15** | Government of Canada (15) | 2 | 1 | 2 |
| **16** | Nidirect Government Services (16) | 8 | 1 | 2 |
| **17** | Confédération suisse (17) | 15 | 1 | 2 |
| **18** | Psychografimata (18) | 7 | 1 | 2 |
| **19** | Official College of Psychology of Catalonia (19) | 14 | 1 | 1 |
| **20** | MIELI ry (20) | 5 | 1 | 2 |
| **21** | Ordem dos psicologos (21) | 13 | 2 | 1 |
| **22** | Beyond Blue (22) | 1 | 1 | 2 |
| **23** | Australian Psychological Society (23) | 1 | 1 | 1 |
| **24** | Mental Health Commission of Canada (24) | 2 | 1 | 2 |
| 25 | British Columbia (25) | 2 | 1 | 2 |
| 26 | Canadian Mental Health Association (26) | 2 | 1 | 2 |
| 27 | City of Toronto (27) | 2 | 1 |  |
| 28 | Here to Help (28) | 2 | 1 | 2 |
| 29 | Center of innovation in Campus Mental Health (29) | 2 | 1 | 2 |
| 30 | U.S. Department of Health and Human Services (30) | 16 | 1 | 2 |
| 31 | Public Health Emergency (31) | 16 | 1 | 2 |
| 32 | Substance Abuse and Mental Health Services Administration (32) | 16 | 1 | 2 |
| 33 | Department of Health (33) | 16 | 1 | 2 |
| 34 | American Medical Association (34) | 16 | 1 | 2 |
| 35 | National Alliance of Mental Illness (35) | 16 | 1 | 2 |
| 36 | Life in Mind (36) | 1 | 1 | 2 |
| 37 | Phoenix Australia (37) | 1 | 1 | 2 |
| 38 | Lifeline (38) | 1 | 1 | 2 |
| 39 | Headspace (39) | 1 | 1 | 2 |
| 40 | Mental Health Coalition South Australia (40) | 1 | 1 | 2 |
| 41 | Better Health – every mind matters (41) | 4 | 1 | 2 |
| 42 | Centre for Mental Health (42) | 4 | 1 | 2 |
| 43 | Mayor of London – London Assembly (43) | 4 | 1 | 2 |
| 44 | Study UK (44) | 4 | 1 | 2 |
| 45 | Rethink Mental Illness (45) | 4 | 1 | 2 |
| 46 | Start a Conversation (46) | 4 | 1 | 2 |

1 Countries: (1) Australia, (2) Canada, (3) China: Hong Kong, (4) England, (5) Finland, (6) Germany, Switzerland and France; CORAASP and CLASS, (7) Greece, (8) Ireland, (9) Italy, (10) Mexico, (11) New Zealand, (12) Portugal, (13) Scotland, (14) Spain, (15) Switzerland and (16) United States of America.

2 Target population: (1) General population and (2) Older adults.

3 Document type: (1) Report and (2) Web page.

*In bold those documents included in the previous review.

Table S2. Number of positive (YES) answers in percentage (%) per document and indicator group (IG)

| **Code** | **IG1** | **IG2** | **IG3** | **IG4** | **IG5** | **IG6** | **IG7** | **Total** |
| --- | --- | --- | --- | --- | --- | --- | --- | --- |
| 1 | 66.67 | 88.89 | **100** | 77.78 | 90 | **100** | **100** | **89.05** |
| 2 | **100** | 77.78 | **100** | 88.89 | 80 | **100** | 40 | 83.81 |
| 3 | **100** | 77.78 | **100** | 44.44 | 60 | 83.33 | 60 | 75.08 |
| 4 | **100** | 66.67 | **100** | 88.89 | 40 | 83.33 | 60 | 76.98 |
| 5 | 50 | 22.22 | **100** | 55.56 | 70 | 75 | 40 | 58.97 |
| 6 | **100** | 77.78 | **100** | 88.89 | **100** | 91.67 | 60 | **88.33** |
| 7 | **100** | 44.44 | **100** | **100** | **100** | 83.33 | 80 | **86.82** |
| 8 | **100** | 11.11 | 66.67 | 33.33 | 20 | 50 | 0 | 40.16 |
| 9 | 50 | 22.22 | **100** | 33.33 | 20 | 83.33 | 60 | 52.7 |
| 10 | 50 | 11.11 | **100** | 66.67 | 90 | **100** | 80 | 71.11 |
| 11 | 50 | 33.33 | 0 | 33.33 | 40 | 16.67 | 0 | 24.76 |
| 12 | **100** | 22.22 | 0 | 66.67 | 60 | 66.67 | 40 | 50.79 |
| 13 | **100** | 44.44 | **100** | **100** | 90 | **100** | 60 | 84.92 |
| 14 | **100** | 77.78 | **100** | 77.78 | 70 | 75 | 60 | 80.08 |
| 15 | 83.33 | 22.22 | **100** | 55.56 | 70 | 83.33 | 20 | 62.06 |
| 16 | 83.33 | 22.22 | **100** | 44.44 | 80 | 91.67 | 80 | 71.67 |
| 17 | 66.67 | 66.67 | **100** | 44.44 | 70 | 66.67 | 40 | 64.92 |
| 18 | 33.33 | 11.11 | 66.67 | 55.56 | 60 | 50 | 40 | 45.24 |
| 19 | 66.67 | 11.11 | **100** | 66.67 | 60 | 66.67 | 40 | 58.73 |
| 20 | 50 | 66.67 | **100** | 55.56 | 60 | 75 | 80 | 69.6 |
| 21 | 66.67 | 22.22 | **100** | 33.33 | 20 | 41.67 | 20 | 43.41 |
| 22 | **100** | 22.22 | **100** | **100** | **100** | 91.67 | 80 | 84.84 |
| 23 | 83.33 | 77.78 | **100** | 55.56 | 80 | 66.67 | **100** | 80.48 |
| 24 | **100** | 66.67 | **100** | 55.56 | 70 | 91.67 | 60 | 77.7 |
| 25 | 50 | 33.33 | **100** | 66.67 | 80 | 91.67 | 40 | 65.95 |
| 26 | **100** | 77.78 | **100** | 55.56 | 90 | 83.33 | 80 | 83.81 |
| 27 | **100** | 55.56 | **100** | 66.67 | **100** | **100** | 80 | **86.03** |
| 28 | **100** | 77.78 | **100** | 66.67 | **100** | **100** | 60 | **86.35** |
| 29 | **100** | 77.78 | **100** | 55.56 | 50 | 83.33 | 60 | 75.24 |
| 30 | **100** | 88.89 | 66.67 | 66.67 | 70 | 83.33 | 80 | 79.37 |
| 31 | **100** | 88.89 | **100** | 77.78 | 80 | 91.67 | **100** | **91.19** |
| 32 | 83.33 | 44.44 | 66.67 | 55.56 | 60 | 75 | 20 | 57.86 |
| 33 | 83.33 | 44.44 | **100** | 66.67 | 80 | 91.67 | **100** | 80.87 |
| 34 | 83.33 | 77.78 | **100** | 88.89 | **100** | 91.67 | 80 | **88.81** |
| 35 | **100** | 66.67 | **100** | 66.67 | **100** | 91.67 | 60 | 83.57 |
| 36 | 66.67 | 22.22 | **100** | 44.44 | 40 | 91.67 | 60 | 60.71 |
| 37 | **100** | 33.33 | **100** | 55.56 | 50 | 58.33 | 60 | 65.32 |
| 38 | 83.33 | 33.33 | 0 | 44.44 | 50 | 50 | 20 | 40.16 |
| 39 | 83.33 | 77.78 | **100** | 44.44 | 50 | 50 | 20 | 60.79 |
| 40 | 50 | 11.11 | **100** | 44.44 | 50 | 66.67 | 0 | 46.03 |
| 41 | **100** | 22.22 | **100** | 44.44 | 40 | 75 | 40 | 60.24 |
| 42 | 83.33 | 66.67 | **100** | 88.89 | **100** | 75 | 60 | 81.98 |
| 43 | 83.33 | 22.22 | **100** | 55.56 | 80 | 75 | 40 | 65.16 |
| 44 | 83.33 | 11.11 | **100** | 33.33 | 40 | 8.33 | 0 | 39.44 |
| 45 | 66.67 | 66.67 | 66.67 | 66.67 | 50 | 83.33 | 0 | 57.14 |
| 46 | 83.33 | 55.56 | **100** | 55.56 | 20 | **100** | 40 | 64.92 |

*In bold the highest scores per indicator group

**Results of the cluster analysis**

Table S3. Mental symptoms (indicator group 1, IG1)

| Clusters | Loneliness | Sleeping problems | Anxiety | Stress | Bereavement | Depression |
| --- | --- | --- | --- | --- | --- | --- |
| Cluster 1 | 100 | 95.45 | 95.45 | 100 | 100 | 100 |
| Cluster 2 | 75 | 62.5 | 100 | 100 | 37.5 | 0 |
| Cluster 3 | 0 | 33.33 | 100 | 100 | 44.44 | 100 |
| Cluster 4 | 100 | 71.43 | 100 | 100 | 0 | 100 |
| Global | 76.09 | 73.91 | 97.83 | 100 | 63.04 | 82.61 |

*Percentage of documents that includes the question (positive answer for this specific question).

Table S4. Mental disorders (indicator group 2, IG2)

| Clusters | Schizophrenia and psychotic disorders | Anxiety disorder | Bipolar disorders | Depression | Substance use disorder | Chronic pain | Eating Disorders | Dermatillomania | Obsessive-compulsive disorder |
| --- | --- | --- | --- | --- | --- | --- | --- | --- | --- |
| Cluster 1 | 37.5 | 75 | 50 | 100 | 100 | 75 | 50 | 12.5 | 50 |
| Cluster 2 | 60.71 | 100 | 57.14 | 100 | 71.43 | 0 | 60.71 | 0 | 57.14 |
| Cluster 3 | 0 | 100 | 0 | 0 | 30 | 0 | 10 | 0 | 0 |
| Global | 43.48 | 95.65 | 43.48 | 78.26 | 67.39 | 13.04 | 47.83 | 2.17 | 43.48 |

*Percentage of documents that includes the question (positive answer for this specific question).

Table S5. COVID-19 information (indicator group 3, IG3)

| Clusters | Question 01 | Question 02 | Question 03 |
| --- | --- | --- | --- |
| Cluster 1 | 100 | 95.35 | 93.02 |
| Cluster 2 | 0 | 0 | 0 |
| Global | 93.48 | 95.35 | 93.02 |

*Percentage of documents that includes the question (positive answer for this specific question).

Table S6. MH strategies & MH topics (indicator group 4, IG4)

| Clusters | Question 04 | Question 06 | Question 08 | Question 26 | Question 27 | Question 28 | Question 29 | Question 32 | Question 39 |
| --- | --- | --- | --- | --- | --- | --- | --- | --- | --- |
| Cluster 1 | 100 | 100 | 100 | 100 | 100 | 100 | 62.5 | 100 | 62.5 |
| Cluster 2 | 100 | 100 | 100 | 83.33 | 0 | 33.33 | 100 | 100 | 33.33 |
| Cluster 3 | 100 | 100 | 100 | 87.5 | 0 | 0 | 0 | 75 | 100 |
| Cluster 4 | 100 | 100 | 87.5 | 0 | 0 | 12.5 | 0 | 37.5 | 0 |
| Cluster 5 | 100 | 100 | 100 | 100 | 14.29 | 28.57 | 14.29 | 0 | 0 |
| Cluster 6 | 100 | 100 | 100 | 100 | 0 | 11.11 | 0 | 100 | 0 |
| Global | 100 | 100 | 97.83 | 78.26 | 19.57 | 30.43 | 26.09 | 69.57 | 32.61 |

*Percentage of documents that includes the question (positive answer for this specific question).

Table S7. MH strategies & MH-related topics (indicator group 5, IG5)

| Clusters | Question 05 | Question 25 | Question 30 | Question 31 | Question 33 | Question 34 | Question 35 | Question 36 | Question 37 | Question 38 |
| --- | --- | --- | --- | --- | --- | --- | --- | --- | --- | --- |
| Cluster 1 | 100 | 30 | 90 | 90 | 60 | 80 | 50 | 40 | 20 | 40 |
| Cluster 2 | 100 | 81.82 | 100 | 100 | 90.91 | 100 | 100 | 90.91 | 100 | 100 |
| Cluster 3 | 100 | 77.78 | 100 | 100 | 77.78 | 0 | 100 | 66.67 | 55.56 | 100 |
| Cluster 4 | 100 | 25 | 12.5 | 0 | 0 | 31.25 | 81.25 | 68.75 | 50 | 81.25 |
| Global | 100 | 50 | 67.39 | 63.04 | 50 | 52.17 | 82.61 | 67.39 | 56.52 | 80.43 |

*Percentage of documents that includes the question (positive answer for this specific question).

Table S8. MH recommendations & MH topics (indicator group 6, IG6)

| Cluster | Question 07 | Question 09 | Question 10 | Question 11 | Question 12 | Question 13 | Question 14 | Question 15 | Question 16 | Question 17 | Question 18 | Question 21 |
| --- | --- | --- | --- | --- | --- | --- | --- | --- | --- | --- | --- | --- |
| Cluster 1 | 100 | 100 | 100 | 100 | 100 | 88.89 | 88.89 | 100 | 100 | 100 | 100 | 100 |
| Cluster 2 | 100 | 100 | 100 | 100 | 0 | 100 | 100 | 100 | 100 | 100 | 100 | 100 |
| Cluster 3 | 100 | 85.71 | 100 | 42.86 | 0 | 71.43 | 42.86 | 100 | 100 | 71.43 | 100 | 0 |
| Cluster 4 | 100 | 100 | 100 | 33.33 | 0 | 100 | 83.33 | 100 | 100 | 0 | 66.67 | 100 |
| Cluster 5 | 100 | 66.67 | 100 | 33.33 | 0 | 66.67 | 33.33 | 66.67 | 0 | 100 | 66.67 | 100 |
| Cluster 6 | 100 | 100 | 100 | 0 | 0 | 88.89 | 77.78 | 100 | 100 | 100 | 88.89 | 100 |
| Cluster 7 | 75 | 100 | 50 | 0 | 0 | 25 | 0 | 25 | 0 | 25 | 50 | 0 |
| Global | 97.83 | 95.65 | 95.65 | 50 | 19.57 | 82.61 | 69.57 | 91.3 | 84.78 | 76.09 | 86.96 | 76.09 |

*Percentage of documents that includes the question (positive answer for this specific question).

Table S9. MH recommendations & MH-related topics (indicator group 7, IG7)

| Clusters | Question 19 | Question 20 | Question 22 | Question 23 | Question 24 |
| --- | --- | --- | --- | --- | --- |
| Cluster 1 | 100 | 100 | 100 | 100 | 100 |
| Cluster 2 | 100 | 78.26 | 43.48 | 0 | 0 |
| Cluster 3 | 100 | 100 | 83.33 | 0 | 100 |
| Cluster 4 | 0 | 0 | 16.67 | 0 | 0 |
| Cluster 5 | 100 | 100 | 57.14 | 100 | 0 |
| Global | 86.96 | 76.09 | 52.17 | 23.91 | 21.74 |

*Percentage of documents that includes the question (positive answer for this specific question).

**References extracted from the systematic review**

1. Australian Government. Head to Health COVID-19 Support [Internet]. 2020. Available from: https://headtohealth.gov.au/Covid-19-support/Covid-19 %0D%0A

2. Centre for Addiction and Mental Health. Mental Health and the COVID-19 Pandemic [Internet]. 2020. Available from: https://www.camh.ca/en/health-info/mental-health-and-covid-19

3. Ireland’s Health Services. Your mental health. Advice on how to mind your mental health during the coronavirus outbreak [Internet]. 2020. Available from: https://www2.hse.ie/mental-health/

4. Mental Health Ireland. Minding Our Mental Health during COVID-19 [Internet]. 2020. Available from: https://www.mentalhealthireland.ie/get-support/covid19/

5. Gobierno de México. Salud Mental [Internet]. 2020. Available from: https://coronavirus.gob.mx/salud-mental/

6. Mental Health America. Mental Health And COVID-19-Information And Resoruces [Internet]. 2020. Available from: https://mhanational.org/covid19

7. Centers for Disease Control and Prevention. Coronavirus Disease 2019 (COVID-19) [Internet]. 2020. Available from: https://www.cdc.gov/coronavirus/2019-ncov/daily-life-coping/managing-stress-anxiety.html?CDC_AA_refVal=https%3A%2F%2Fwww.cdc.gov%2Fcoronavirus%2F2019-ncov%2Fprepare%2Fmanaging-stress-anxiety.html

8. MindHK. Managing our Mental Health & Staying Well during a Virus Outbreak. Responding to 2019-nCOV [Internet]. 2020. Available from: https://www.mind.org.hk/wp-content/uploads/2020/02/ResponseCoronavirusENG6.2.2020-.pdf

9. Centre for Health Protection. Mental Health Infostation [Internet]. 2020. Available from: https://www.chp.gov.hk/mhi/index_en.html

10. New Zealand Government. Ways we’re uniting agains COVID-19 [Internet]. 2020. Available from: https://covid19.govt.nz/

11. Spanish Society of Psychiatry. CUIDE SU SALUD MENTAL DURANTE LA CUARENTENA POR CORONAVIRUS [Internet]. 2020. Available from: http://www.sepsiq.org/file/InformacionSM/SEP COVID19-Salud Mental Cuarentena.pdf %0D%0A

12. Psychology General Council of Spain. Orientaciones para la gestión psicológica de la cuarentena por el Coronavirus [Internet]. 2020. Available from: http://www.infocop.es/view_article.asp?id=8655

13. GOV.UK. Guidance for the public on the mental health and wellbeing aspects of coronavirus (COVID-19) [Internet]. 2020. Available from: https://www.gov.uk/government/publications/covid-19-guidance-for-the-public-on-mental-health-and-wellbeing/guidance-for-the-public-on-the-mental-health-and-wellbeing-aspects-of-coronavirus-covid-19

14. Mental Health Foundation. How to look after your mental health during the Coronavirus outbreak [Internet]. 2020. Available from: https://www.mentalhealth.org.uk/coronavirus

15. Government of Canada. Taking care of your mental health during COVID-19 [Internet]. 2020. Available from: https://www.canada.ca/en/public-health/services/publications/diseases-conditions/taking-care-mental-health.html

16. Nidirect Government Services. Coronavirus (COVID-19): taking care of your mental health and wellbeing [Internet]. 2020. Available from: https://www.nidirect.gov.uk/articles/coronavirus-Covid-19-taking-care-your-mental-health-and-wellbeing

17. Confédération suisse. Nouveau coronavirus: Recommandations pour la vie quotidienne [Internet]. 2020. Available from: https://www.bag.admin.ch/bag/fr/home/krankheiten/ausbrueche-epidemien-pandemien/aktuelle-ausbrueche-epidemien/novel-cov/empfehlungen-fuer-den-alltag.html

18. Psychografimata. Corona: 8 ways to take care of your mental health [Internet]. 2020. Available from: https://www.psychografimata.com/κοροναϊός-8-τρόποι-να-φροντίσετε-την-ψυ/

19. Official College of Psychology of Catalonia. Recomendaciones de gestión psicológica durante cuarentenas por enfermedades infecciosas [Internet]. 2020. Available from: https://www.copc.cat/adjuntos/adjunto_15214/v/Guía de gestión psicológica frente a cuarentenas por enfermedades infecciosas- Español.pdf?tm=1584361973

20. MIELY ry. Koronaviruksen ai-heuttama huolta voi lievittää [Internet]. 2020. Available from: https://mieli.fi/fi/koronaviruksen-aiheuttamaa-huolta-voi-lievittää

21. Ordem dos Psicologos. COVID-19 COMO LIDAR COM UMA SITUAÇÃO DE ISOLAMENTO SE FOR UM CIDADÃO SÉNIOR (OU SEU FAMILIAR) [Internet]. 2020. Available from: https://www.ordemdospsicologos.pt/ficheiros/documentos/covid_19_seniores.pdf

22. Beyond Blue. Coronavirus Mental Wellbeing Support Service [Internet]. 2020. Available from: https://coronavirus.beyondblue.org.au/

23. Australian Psychological Society. Coronavirus (COVID-19) information for Australians [Internet]. 2020. Available from: https://www.psychology.org.au/COVID-19-Australians

24. Mental Health Comission of Canada. Resource Hub: Mental health and wellness during the COVID-19 pandemic [Internet]. 2020. Available from: https://www.mentalhealthcommission.ca/English/covid19

25. Bristish Columbia. Virtual mental health supports [Internet]. 2021 [cited 2021 Sep 15]. Available from: https://www2.gov.bc.ca/gov/content/health/managing-your-health/mental-health-substance-use/virtual-mental-health-supports

26. Canadian Mental Health Association. Everyone deserves to feel well [Internet]. 2021 [cited 2021 Sep 15]. Available from: https://cmha.ca/

27. City of Toronto. COVID-19: Mental Health Resources [Internet]. 2021 [cited 2021 Sep 15]. Available from: https://www.toronto.ca/community-people/health-wellness-care/covid-19-wellness-during-the-pandemic/covid-19-mental-health-resources/

28. BC Partners for Mental Health and Substance Use Information. Here to help - Mental health and substance use information you can trust [Internet]. 2021 [cited 2021 Sep 15]. Available from: https://www.heretohelp.bc.ca/covid-19-mental-health-supports

29. Center for Innovation in Campus Mental Health. COVID-19 Resources [Internet]. 2021 [cited 2021 Sep 15]. Available from: https://campusmentalhealth.ca/covid-19-resources/

30. U.S. Department of Health & Human Services. COVID-19 VACCINES ARE SAFE, EFFECTIVE, AND FREE [Internet]. 2021 [cited 2021 Sep 15]. Available from: https://www.hhs.gov/

31. Public Health Emergency. Mental and Behavioural Health - 2019 Novel Coronavirus Resources [Internet]. 2021 [cited 2021 Sep 15]. Available from: https://www.phe.gov/emergency/events/COVID19/mental-behavioral-health/Pages/default.aspx

32. Substance Abuse and Mental Health Services Administration. Get help [Internet]. 2021 [cited 2021 Sep 15]. Available from: https://www.samhsa.gov/

33. Department of Health. Supporting Mental Well-being During COVID-19 [Internet]. 2021 [cited 2021 Sep 15]. Available from: https://www.health.state.mn.us/communities/mentalhealth/support.html

34. American Medical Association. Managing mental health during COVID-19 [Internet]. 2021 [cited 2021 Sep 15]. Available from: https://www.ama-assn.org/delivering-care/public-health/managing-mental-health-during-covid-19

35. National Alliance on Mental Illness. From Next Door To Across The Nation [Internet]. 2021 [cited 2021 Sep 15]. Available from: https://nami.org/Home

36. Life in Mind. Coronavirus (COVID-19) mental health support [Internet]. 2021 [cited 2021 Sep 15]. Available from: https://lifeinmind.org.au/communities/support-for-those-impacted-by-adverse-events/mental-health-support-for-covid-19

37. Phoenix Australia. Resources Coronavirus (COVID-19) [Internet]. 2021 [cited 2021 Sep 15]. Available from: https://www.phoenixaustralia.org/resources/coronavirus-covid-19/

38. Lifeline. Mental health and wellbeing during the Coronavirus COVID-19 outbreak [Internet]. 2021 [cited 2021 Sep 15]. Available from: https://www.lifeline.org.au/get-help/information-and-support/covid-19/

39. Headspace. How to cope with stress related to Coronavirus (COVID-19) [Internet]. 2021 [cited 2021 Sep 15]. Available from: https://headspace.org.au/young-people/how-to-cope-with-stress-related-to-covid-19/

40. Mental Health Coalition South Australia. COVID-19: Mental health in uncertain times [Internet]. 2021 [cited 2021 Sep 15]. Available from: https://mhcsa.org.au/covid-19-mental-health-in-uncertain-times/

41. Better Health - every mind matters. Mental wellbeing while staying at home [Internet]. 2021 [cited 2021 Sep 15]. Available from: https://www.nhs.uk/every-mind-matters/coronavirus/mental-wellbeing-while-staying-at-home/

42. Centre for Mental Health. Coronavirus: resources and information [Internet]. 2021 [cited 2021 Sep 15]. Available from: https://www.centreformentalhealth.org.uk/coronavirus-resources-and-information

43. Mayor of London - London Assembly. Coronavirus and looking after your mental health [Internet]. 2021 [cited 2021 Sep 15]. Available from: https://www.london.gov.uk/coronavirus/coronavirus-and-looking-after-your-mental-health

44. Study UK. Covid-19: Information for international students [Internet]. 2021 [cited 2021 Sep 15]. Available from: https://study-uk.britishcouncil.org/moving-uk/coronavirus

45. Rethink Mental Illness. Coronavirus and mental health [Internet]. 2021 [cited 2021 Sep 24]. Available from: https://www.rethink.org/advice-and-information/covid-19-support/

46. Start a Conversation. Mental Health Support During COVID-19 lockdown [Internet]. 2021 [cited 2021 Sep 24]. Available from: https://www.startaconversation.co.uk/coronavirus-and-mental-wellbeing
